# Supplementary material for: Syntheses and structures of a family of heterometallic pentanuclear [MnIII3LnNa] (Ln = Dy, Tb, Gd and Nd) complexes: H-bonding reduces the nuclearity from nine to five
Source: Royal Society of Chemistry journal article supplement (doi:10.1039/c3ce41863d), 2013-10-30
Supplement: c3ce41863d.pdf [file c3ce41863d.pdf]

## *Electronic Supplementary Information*

# Syntheses and Structures of a Family of Heterometallic Pentanuclear $[\text{Mn}^{\text{III}}_3\text{LnNa}]$ (Ln = Dy, Tb, Gd and Nd) Complexes: H-bonding Reduces the Nuclearity From Nine to Five

*Vadapalli Chandrasekhar, \*<sup>a,b</sup>Atanu Dey<sup>a</sup>, Sourav Das<sup>a</sup> and Subrata Kundu<sup>a</sup>*

<sup>a</sup>Department of Chemistry, Indian Institute of Technology Kanpur, Kanpur-208016, India; <sup>b</sup>Tata Institute of Fundamental Research, Centre for Interdisciplinary Sciences, 21 Brundavan Colony, Narsingi, Hyderabad-500075, India

AUTHOR EMAIL ADDRESS: [vc@iitk.ac.in](mailto:vc@iitk.ac.in)

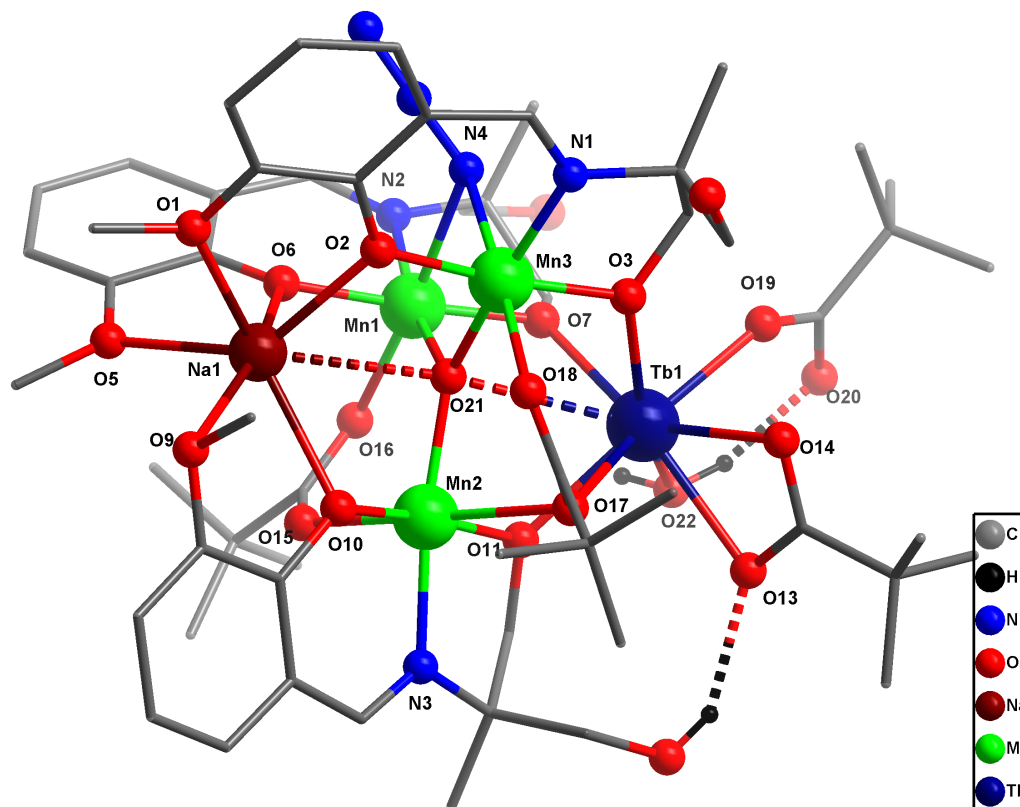

Figure S1. Molecular structure of **2**. All the hydrogen atoms (except those that take part in H-bonding) and a solvent molecule (water) have been omitted for clarity.

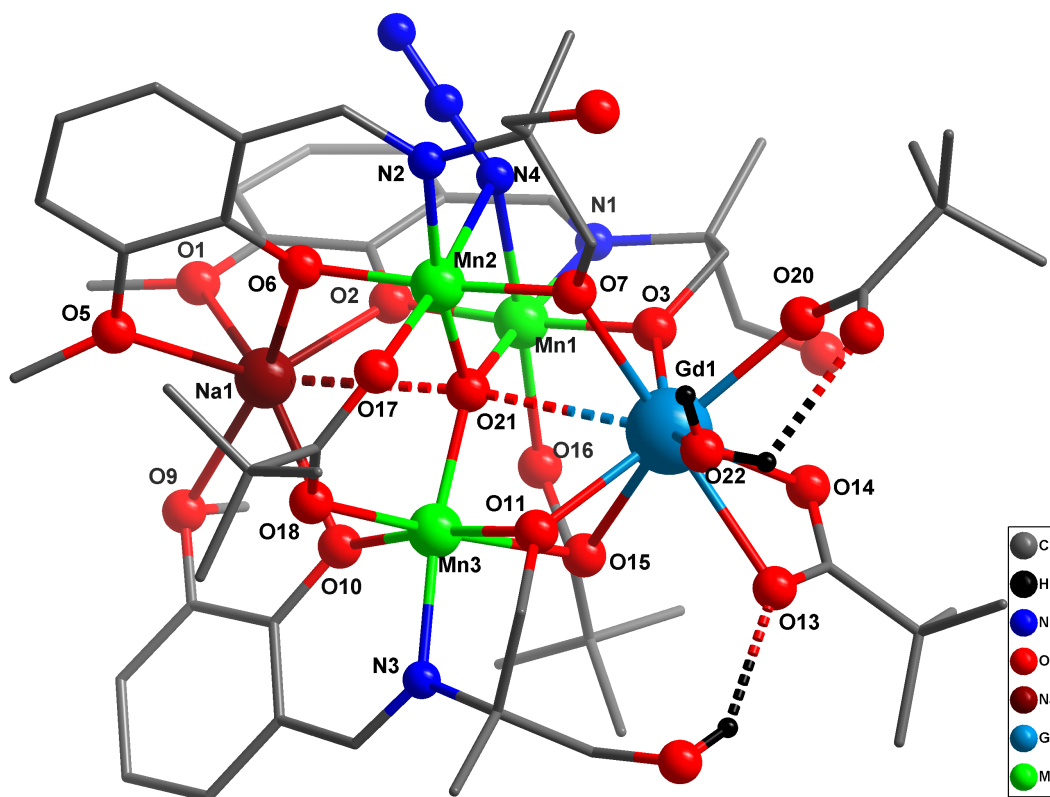

Figure S2. Molecular structure of **3**. All the hydrogen atoms (except those that take part in H-bonding) and a solvent molecule (water) have been omitted for clarity.

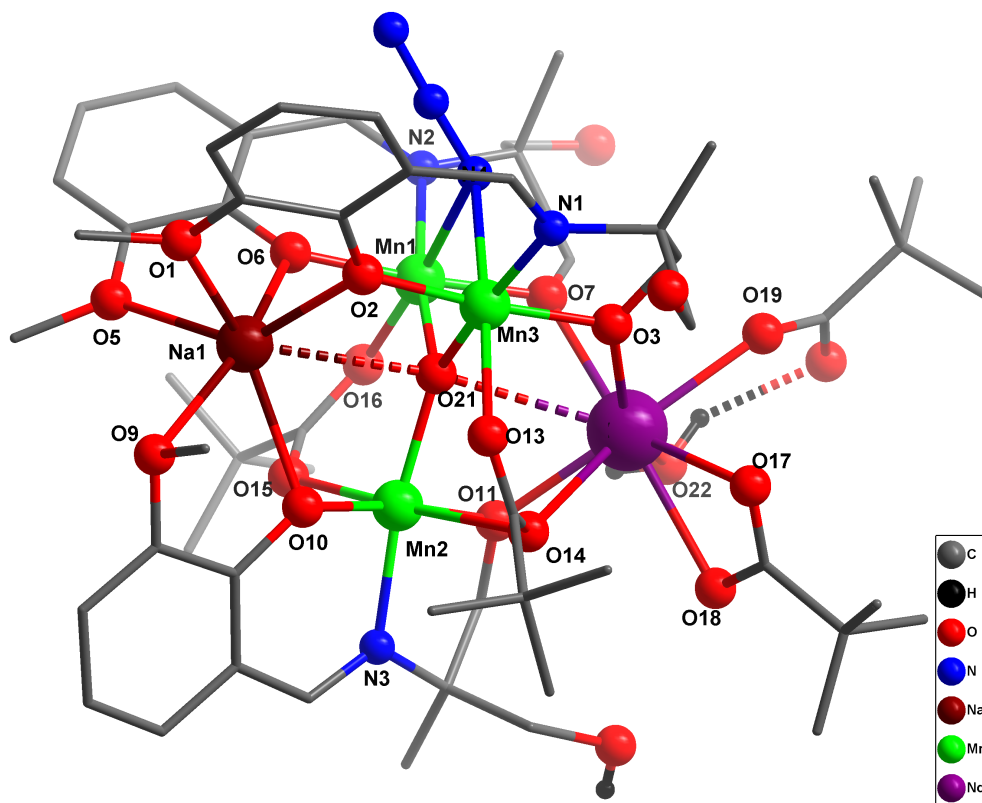

Figure S3. Molecular structure of **4**. All the hydrogen atoms (except those that take part in H-bonding) and a solvent molecule (water) have been omitted for clarity.

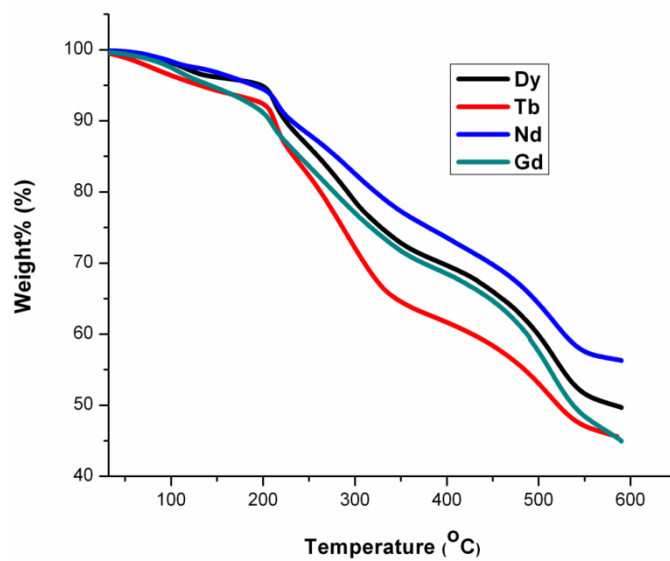

Figure S4. TGA of **1-4**.

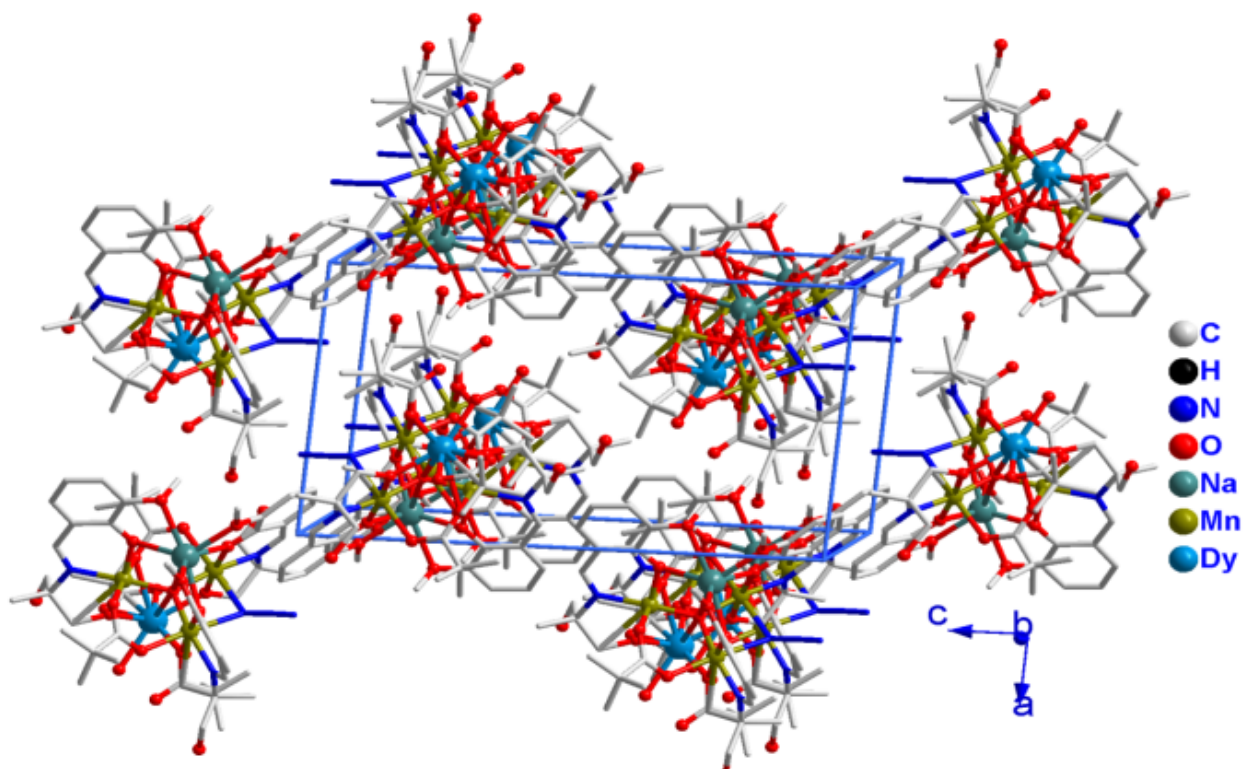

Figure S5. Packing diagram of **1** along the crystallographic 'b' axis.

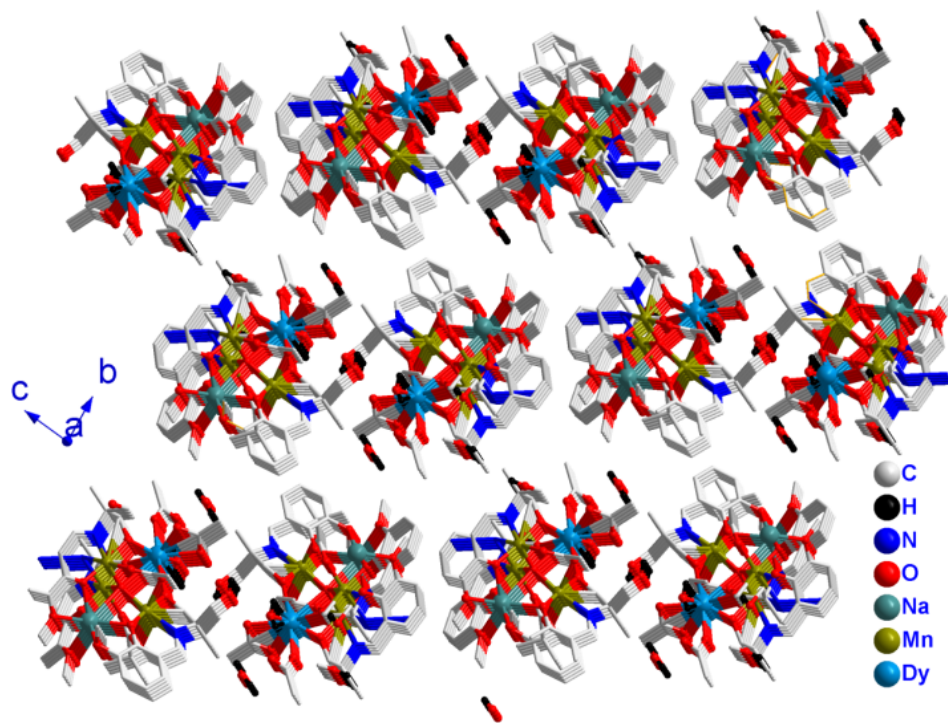

Figure S6. A 3-dimensional view of the one dimensional chain along the crystallographic 'a' axis of **1**.

**Table S1.** Comparison of the selected bond distances (Å) for **1–4**.

|                                  | Ln= Dy( <b>1</b> ) | Ln= Tb ( <b>2</b> ) | Ln= Gd( <b>3</b> ) | Ln= Nd( <b>4</b> ) |
|----------------------------------|--------------------|---------------------|--------------------|--------------------|
| Mn–O <sub>phenolate</sub>        | 1.914(6)           | 1.908(4)            | 1.907(9)           | 1.898(6)           |
|                                  | 1.886(6)           | 1.891(4)            | 1.901(9)           | 1.882(6)           |
|                                  | 1.906(6)           | 1.897(4)            | 1.889(9)           | 1.892(6)           |
| Mn–O <sub>alcoholic</sub>        | 1.898(6)           | 1.882(4)            | 1.872(8)           | 1.870(6)           |
|                                  | 1.875(5)           | 1.882(4)            | 1.896(8)           | 1.871(6)           |
|                                  | 1.886(5)           | 1.881(4)            | 1.878(8)           | 1.874(6)           |
| Mn–N <sub>imino</sub>            | 2.001(7)           | 1.993(5)            | 2.014(11)          | 1.995(8)           |
|                                  | 2.019(6)           | 2.027(5)            | 1.994(10)          | 2.024(7)           |
|                                  | 2.020(7)           | 2.017(5)            | 2.011(10)          | 2.013(8)           |
| Mn–N <sub>azide</sub>            | 2.318(6)           | 2.334(5)            | 2.254(10)          | 2.337(8)           |
|                                  | 2.235(6)           | 2.256(5)            | 2.340(10)          | 2.256(7)           |
| Mn– $\mu_3$ -O <sup>2-</sup>     | 1.919(5)           | 1.911(4)            | 1.973(8)           | 1.919(6)           |
|                                  | 1.929(5)           | 1.927(4)            | 1.907(8)           | 1.941(5)           |
|                                  | 1.946(5)           | 1.957(4)            | 1.931(8)           | 1.974(6)           |
| Mn– $\mu$ -OAc                   | 2.164(5)           | 2.151(4)            | 2.166(8)           | 2.163(7)           |
|                                  | 2.139(6)           | 2.143(5)            | 2.133(9)           | 2.144(7)           |
| Mn– $\mu_3$ -OAc                 | 2.344(6)           | 2.350(4)            | 2.194(9)           | 2.200(7)           |
|                                  | 2.192(5)           | 2.195(4)            | 2.357(9)           | 2.355(7)           |
| Ln–O <sub>alcoholic</sub>        | 2.363(6)           | 2.298(4)            | 2.311(8)           | 2.348(6)           |
|                                  | 2.281(5)           | 2.379(4)            | 2.393(8)           | 2.457(6)           |
|                                  | 2.274(5)           | 2.291(4)            | 2.309(8)           | 2.356(6)           |
| Ln–OAc <sub>terminal</sub>       | 2.313(6)           | 2.326(5)            | 2.320(10)          | 2.368(7)           |
| Ln– $\eta^2$ -OAc                | 2.430(6)           | 2.455(5)            | 2.467(9)           | 2.513(7)           |
|                                  | 2.454(6)           | 2.445(5)            | 2.470(9)           | 2.516(6)           |
| Ln–OH <sub>2terminal</sub>       | 2.413(6)           | 2.407(5)            | 2.444(9)           | 2.498(7)           |
| Ln– $\mu_3$ -OAc                 | 2.726(6)           | 2.750(4)            | 2.691(9)           | 2.752(7)           |
| Ln----- $\mu_3$ -O <sup>2-</sup> | 2.857(5)           | 2.882(4)            | 2.838(8)           | 2.881(6)           |
| Na–O <sub>OMe</sub>              | 2.435(7)           |                     |                    |                    |
|                                  | 2.545(7)           | 2.428(6)            | 2.404(10)          | 2.425(8)           |
|                                  | 2.425(7)           | 2.420(6)            | 2.437(10)          | 2.422(9)           |
|                                  |                    | 2.550(5)            | 2.543(11)          | 2.551(8)           |
| Na–O <sub>phenolate</sub>        | 2.322(7)           |                     |                    |                    |
|                                  | 2.407(6)           | 2.341(5)            | 2.328(10)          | 2.337(8)           |
|                                  | 2.337(7)           | 2.321(5)            | 2.341(10)          | 2.319(8)           |
|                                  |                    | 2.412(5)            | 2.405(10)          | 2.406(7)           |
| Na----- $\mu_3$ -O <sup>2-</sup> | 2.844(6)           | 2.843(5)            | 2.873(9)           | 2.854(7)           |

|           |          |          |          |          |
|-----------|----------|----------|----------|----------|
| Mn-----Mn | 3.312(2) | 3.313(2) | 3.115(3) | 3.329(2) |
|           | 3.109(2) | 3.112(2) | 3.590(3) | 3.129(2) |
|           | 3.568(2) | 3.569(2) | 3.312(3) | 3.601(2) |
| Mn-----Ln | 3.560(2) | 3.575(1) | 3.526(2) | 3.61 (2) |
|           | 3.347(2) | 3.360(1) | 3.571(2) | 3.385(2) |
|           | 3.514(1) | 3.531(1) | 3.351(2) | 3.561(2) |
| Mn-----Na | 3.493(4) | 3.496(3) | 3.359(5) | 3.491(4) |
|           | 3.354(4) | 3.358(3) | 3.441(6) | 3.352(4) |
|           | 3.436(4) | 3.444(3) | 3.501(5) | 3.436(4) |
| Na-----Ln | 5.689(3) | 5.712(1) | 5.697(5) | 5.721(4) |

**Table S2.** Selected bond distances (Å) and bond angles (°) for compound **1(Mn<sub>3</sub>DyNa)**.

|                                         |                                        |                                  |
|-----------------------------------------|----------------------------------------|----------------------------------|
| <b>Bond Lengths around Manganese(1)</b> | <b>Bond Angles around Manganese(1)</b> | O(3)-Dy(1)-O(14) 148.0(2)        |
| N(1)-Mn(1) 2.001(7)                     | O(3)-Mn(1)-O(2) 176.3(2)               | O(22)-Dy(1)-O(14) 115.8(2)       |
| N(4)-Mn(1) 2.318(6)                     | O(3)-Mn(1)-O(21) 90.5(2)               | O(13)-Dy(1)-O(14) 52.5(2)        |
| O(2)-Mn(1) 1.914(6)                     | O(2)-Mn(1)-O(21) 92.9(2)               | O(11)-Dy(1)-O(17) 74.93(18)      |
| O(3)-Mn(1) 1.898(6)                     | O(3)-Mn(1)-N(1) 84.3(3)                | O(7)-Dy(1)-O(17) 65.28(18)       |
| O(15)-Mn(1) 2.164(5)                    | O(2)-Mn(1)-N(1) 92.1(3)                | O(19)-Dy(1)-O(17) 145.8(2)       |
| O(21)-Mn(1) 1.919(5)                    | O(21)-Mn(1)-N(1) 169.6(3)              | O(3)-Dy(1)-O(17) 120.95(17)      |
| <b>Bond Lengths around Manganese(2)</b> | O(3)-Mn(1)-O(15) 92.2(2)               | O(22)-Dy(1)-O(17) 133.03(19)     |
| N(2)-Mn(2) 2.019(6)                     | O(2)-Mn(1)-O(15) 88.4(2)               | O(13)-Dy(1)-O(17) 76.84(19)      |
| O(6)-Mn(2) 1.886(6)                     | O(21)-Mn(1)-O(15) 102.4(2)             | O(14)-Dy(1)-O(17) 72.7(2)        |
| O(7)-Mn(2) 1.875(5)                     | N(1)-Mn(1)-O(15) 86.9(2)               | O(11)-Dy(1)-O(21) 62.34(17)      |
| O(16)-Mn(2) 2.139(6)                    | O(3)-Mn(1)-N(4) 88.9(2)                | O(7)-Dy(1)-O(21) 62.51(17)       |
| O(17)-Mn(2) 2.344(6)                    | O(2)-Mn(1)-N(4) 90.2(2)                | O(19)-Dy(1)-O(21) 129.99(18)     |
| O(21)-Mn(2) 1.929(5)                    | O(21)-Mn(1)-N(4) 82.5(2)               | O(3)-Dy(1)-O(21) 61.74(17)       |
| <b>Bond Lengths around Manganese(3)</b> | N(1)-Mn(1)-N(4) 88.3(2)                | O(22)-Dy(1)-O(21) 121.90(19)     |
| N(3)-Mn(3) 2.020(7)                     | O(15)-Mn(1)-N(4) 174.9(2)              | O(13)-Dy(1)-O(21) 132.81(18)     |
| N(4)-Mn(3) 2.235(6)                     | <b>Bond Angles around Manganese(2)</b> | O(14)-Dy(1)-O(21) 120.78(19)     |
| O(10)-Mn(3) 1.906(6)                    | O(7)-Mn(2)-O(6) 172.7(2)               | O(17)-Dy(1)-O(21) 59.34(15)      |
| O(11)-Mn(3) 1.886(5)                    | O(7)-Mn(2)-O(21) 90.9(2)               | <b>Bond Angles around Sodium</b> |
| O(18)-Mn(3) 2.192(5)                    |                                        | O(2)-Na(1)-O(10) 92.4(2)         |
|                                         |                                        | O(2)-Na(1)-O(6) 116.2(2)         |



|                                                         |                                            |                                                            |
|---------------------------------------------------------|--------------------------------------------|------------------------------------------------------------|
| O(21)-Mn(3) 1.946(5)                                    | O(6)-Mn(2)-O(21) 94.1(2)                   | O(10)-Na(1)-O(6) 98.0(2)                                   |
| <b>Bond Lengths around<br/>Dysprosium</b>               | O(7)-Mn(2)-N(2) 82.9(3)                    | O(2)-Na(1)-O(9) 109.8(2)                                   |
| O(3)-Dy(1) 2.363(6)                                     | O(6)-Mn(2)-N(2) 91.7(3)                    | O(10)-Na(1)-O(9) 65.9(2)                                   |
| O(7)-Dy(1) 2.281(5)                                     | O(21)-Mn(2)-N(2) 172.2(3)                  | O(6)-Na(1)-O(9) 131.9(2)                                   |
| O(11)-Dy(1) 2.274(5)                                    | O(7)-Mn(2)-O(16) 95.0(2)                   | O(2)-Na(1)-O(1) 65.7(2)                                    |
| O(13)-Dy(1) 2.430(6)                                    | O(6)-Mn(2)-O(16) 89.6(2)                   | O(10)-Na(1)-O(1) 139.8(3)                                  |
| O(14)-Dy(1) 2.454(6)                                    | O(21)-Mn(2)-O(16) 98.3(2)                  | O(6)-Na(1)-O(1) 121.6(3)                                   |
| O(17)-Dy(1) 2.726(6)                                    | N(2)-Mn(2)-O(16) 86.9(3)                   | O(9)-Na(1)-O(1) 89.4(3)                                    |
| O(19)-Dy(1) 2.313(6)                                    | O(7)-Mn(2)-O(17) 79.7(2)                   | O(2)-Na(1)-O(5) 164.2(3)                                   |
| O(21)-Dy(1) 2.857(5)                                    | O(6)-Mn(2)-O(17) 96.0(2)                   | O(10)-Na(1)-O(5) 103.1(2)                                  |
| O(22)-Dy(1) 2.413(6)                                    | O(21)-Mn(2)-O(17) 80.0(2)                  | O(6)-Na(1)-O(5) 65.3(2)                                    |
| <b>Bond Lengths around<br/>Sodium</b>                   | N(2)-Mn(2)-O(17) 94.2(2)                   | O(9)-Na(1)-O(5) 74.5(2)                                    |
| O(1)-Na(1) 2.435(7)                                     | O(16)-Mn(2)-O(17) 174.3(2)                 | O(1)-Na(1)-O(5) 99.7(2)                                    |
| O(2)-Na(1) 2.322(7)                                     | <b>Bond Angles around<br/>Manganese(3)</b> | O(2)-Na(1)-O(21) 64.10(19)                                 |
| O(5)-Na(1) 2.545(7)                                     | O(11)-Mn(3)-O(10) 173.8(2)                 | O(10)-Na(1)-O(21) 66.38(19)                                |
| O(6)-Na(1) 2.407(6)                                     | O(11)-Mn(3)-O(21) 89.7(2)                  | O(6)-Na(1)-O(21) 63.63(18)                                 |
| O(9)-Na(1) 2.425(7)                                     | O(10)-Mn(3)-O(21) 96.2(2)                  | O(9)-Na(1)-O(21) 131.5(2)                                  |
| O(10)-Na(1) 2.337(7)                                    | O(11)-Mn(3)-N(3) 82.3(3)                   | O(1)-Na(1)-O(21) 123.3(2)                                  |
| O(21)-Na(1) 2.844(6)                                    | O(10)-Mn(3)-N(3) 91.7(3)                   | O(5)-Na(1)-O(21) 125.1(2)                                  |
| <b>Bond Lengths containing<br/>Sodium and Manganese</b> | O(21)-Mn(3)-N(3) 170.7(3)                  | <b>Bond Angles containing<br/>Manganese and Dysprosium</b> |
| Na(1)-Mn(1) 3.493(4)                                    | O(11)-Mn(3)-O(18) 92.6(2)                  | Mn(1)-O(3)-Dy(1) 112.8(2)                                  |
| Na(1)-Mn(2) 3.354(4)                                    | O(10)-Mn(3)-O(18) 89.1(2)                  | Mn(2)-O(7)-Dy(1) 106.9(2)                                  |
| Na(1)-Mn(3) 3.436(4)                                    | O(21)-Mn(3)-O(18) 93.5(2)                  | Mn(3)-O(11)-Dy(1) 115.0(3)                                 |
| <b>Bond Lengths containing<br/>Manganese-Manganese</b>  | N(3)-Mn(3)-O(18) 91.4(3)                   | Mn(2)-O(17)-Dy(1) 82.26(18)                                |
| Mn(1)-Mn(2) 3.312(2)                                    | O(11)-Mn(3)-N(4) 89.0(2)                   | Mn(1)-O(21)-Dy(1) 94.31(18)                                |
| Mn(1)-Mn(3) 3.109(2)                                    | O(10)-Mn(3)-N(4) 89.6(2)                   | Mn(2)-O(21)-Dy(1) 86.45(17)                                |
| Mn(2)-Mn(3) 3.568(2)                                    | O(21)-Mn(3)-N(4) 84.2(2)                   | Mn(3)-O(21)-Dy(1) 92.05(19)                                |
| <b>Bond Lengths containing<br/>Manganese-Dysprosium</b> | N(3)-Mn(3)-N(4) 91.1(3)                    | <b>Bond Angles containing<br/>Manganese and Sodium</b>     |
| Mn(1)-Dy(1) 3.560(2)                                    | O(18)-Mn(3)-N(4) 177.2(2)                  | Mn(1)-O(2)-Na(1) 110.8(3)                                  |
| Mn(2)-Dy(1) 3.347(2)                                    | <b>Bond Angles around<br/>Dysprosium</b>   | Mn(2)-O(6)-Na(1) 102.1(2)                                  |
| Mn(3)-Dy(1) 3.514(1)                                    | O(11)-Dy(1)-O(7) 122.85(19)                | Mn(3)-O(10)-Na(1) 107.7(3)                                 |
| <b>Bond Length containing<br/>Sodium-Dysprosium</b>     | O(11)-Dy(1)-O(19) 82.6(2)                  | Mn(1)-O(21)-Na(1) 92.3(2)                                  |
| Na(1)-Dy(1) 5.689(3)                                    | O(7)-Dy(1)-O(19) 148.3(2)                  | Mn(2)-O(21)-Na(1) 87.06(19)                                |
|                                                         | O(11)-Dy(1)-O(3) 81.94(19)                 | Mn(3)-O(21)-Na(1) 89.62(19)                                |
|                                                         | O(7)-Dy(1)-O(3) 85.06(19)                  |                                                            |
|                                                         | O(19)-Dy(1)-O(3) 80.0(2)                   | <b>Bond Angles containing</b>                              |
|                                                         | O(11)-Dy(1)-O(22) 151.4(2)                 |                                                            |
|                                                         | O(7)-Dy(1)-O(22) 75.1(2)                   |                                                            |



|  |                   |           |                                                            |                            |
|--|-------------------|-----------|------------------------------------------------------------|----------------------------|
|  | O(19)-Dy(1)-O(22) | 74.5(2)   | <b>Manganese(1),<br/>Manganese(2) and<br/>Manganese(3)</b> |                            |
|  | O(3)-Dy(1)-O(22)  | 77.55(19) |                                                            |                            |
|  | O(11)-Dy(1)-O(13) | 124.5(2)  |                                                            |                            |
|  | O(7)-Dy(1)-O(13)  | 84.82(19) |                                                            |                            |
|  | O(19)-Dy(1)-O(13) | 95.9(2)   |                                                            | Mn(3)-N(4)-Mn(1) 86.1(2)   |
|  | O(3)-Dy(1)-O(13)  | 152.7(2)  |                                                            | Mn(1)-O(21)-Mn(2) 118.8(3) |
|  | O(22)-Dy(1)-O(13) | 75.4(2)   |                                                            | Mn(1)-O(21)-Mn(3) 107.1(2) |
|  | O(11)-Dy(1)-O(14) | 73.8(2)   |                                                            | Mn(2)-O(21)-Mn(3) 134.0(3) |
|  | O(7)-Dy(1)-O(14)  | 125.7(2)  |                                                            |                            |
|  | O(19)-Dy(1)-O(14) | 76.5(2)   |                                                            |                            |

**Table S3.** Selected bond distances (Å) and bond angles (°) for compound **2(Mn<sub>3</sub>TbNa)**.

|                                             |                                            |                                  |
|---------------------------------------------|--------------------------------------------|----------------------------------|
| <b>Bond Lengths around<br/>Manganese(1)</b> | <b>Bond Angles around<br/>Manganese(1)</b> | O(11)-Tb(1)-O(13) 84.13(15)      |
| N(2)-Mn(1) 1.993(5)                         | O(7)-Mn(1)-O(6) 176.23(19)                 | O(3)-Tb(1)-O(13) 124.65(16)      |
| N(4)-Mn(1) 2.334(5)                         | O(7)-Mn(1)-O(21) 90.72(18)                 | O(19)-Tb(1)-O(13) 97.01(17)      |
| O(6)-Mn(1) 1.908(4)                         | O(6)-Mn(1)-O(21) 92.58(18)                 | O(7)-Tb(1)-O(13) 153.46(15)      |
| O(7)-Mn(1) 1.882(4)                         | O(7)-Mn(1)-N(2) 84.4(2)                    | O(22)-Tb(1)-O(13) 75.23(16)      |
| O(16)-Mn(1) 2.151(4)                        | O(6)-Mn(1)-N(2) 92.0(2)                    | O(14)-Tb(1)-O(13) 53.03(15)      |
| O(21)-Mn(1) 1.911(4)                        | O(21)-Mn(1)-N(2) 170.2(2)                  | O(11)-Tb(1)-O(17) 65.16(14)      |
| <b>Bond Lengths around<br/>Manganese(2)</b> | O(7)-Mn(1)-O(16) 92.93(18)                 | O(3)-Tb(1)-O(17) 74.48(14)       |
| N(3)-Mn(2) 2.027(5)                         | O(6)-Mn(1)-O(16) 88.11(18)                 | O(19)-Tb(1)-O(17) 145.82(15)     |
| O(10)-Mn(2) 1.891(4)                        | O(21)-Mn(1)-O(16) 102.56(17)               | O(7)-Tb(1)-O(17) 120.01(13)      |
| O(15)-Mn(2) 2.143(5)                        | N(2)-Mn(1)-O(16) 86.3(2)                   | O(22)-Tb(1)-O(17) 133.04(15)     |
| O(17)-Mn(2) 2.350(4)                        | O(7)-Mn(1)-N(4) 88.96(19)                  | O(14)-Tb(1)-O(17) 72.88(15)      |
| O(11)-Mn(2) 1.882(4)                        | O(6)-Mn(1)-N(4) 89.64(19)                  | O(13)-Tb(1)-O(17) 76.39(14)      |
| O(21)-Mn(2) 1.927(4)                        | O(21)-Mn(1)-N(4) 83.20(18)                 | O(11)-Tb(1)-O(21) 62.30(13)      |
| <b>Bond Lengths around<br/>Manganese(3)</b> | N(2)-Mn(1)-N(4) 88.1(2)                    | O(3)-Tb(1)-O(21) 62.18(13)       |
| N(1)-Mn(3) 2.017(5)                         | O(16)-Mn(1)-N(4) 173.90(18)                | O(19)-Tb(1)-O(21) 129.70(15)     |
| N(4)-Mn(3) 2.256(5)                         | <b>Bond Angles around<br/>Manganese(2)</b> | O(7)-Tb(1)-O(21) 60.85(13)       |
| O(2)-Mn(3) 1.897(4)                         | O(11)-Mn(2)-O(10) 172.31(19)               | O(22)-Tb(1)-O(21) 122.08(14)     |
| O(3)-Mn(3) 1.881(4)                         | O(11)-Mn(2)-O(21) 91.27(18)                | O(14)-Tb(1)-O(21) 120.87(14)     |
| O(18)-Mn(3) 2.195(4)                        | O(10)-Mn(2)-O(21) 94.04(18)                | O(13)-Tb(1)-O(21) 132.07(14)     |
| O(21)-Mn(3) 1.957(4)                        | O(11)-Mn(2)-N(3) 82.5(2)                   | O(17)-Tb(1)-O(21) 59.27(12)      |
| <b>Bond Lengths around<br/>Terbium</b>      | O(10)-Mn(2)-N(3) 91.8(2)                   | <b>Bond Angles around Sodium</b> |
|                                             | O(21)-Mn(2)-N(3) 172.6(2)                  | O(6)-Na(1)-O(2) 91.71(18)        |
|                                             | O(11)-Mn(2)-O(15) 94.86(18)                | O(6)-Na(1)-O(10) 116.27(18)      |
|                                             |                                            | O(2)-Na(1)-O(10) 97.59(18)       |
|                                             |                                            | O(6)-Na(1)-O(5) 66.31(17)        |
|                                             |                                            | O(2)-Na(1)-O(5) 139.9(2)         |

|                                                     |                                        |                                                                           |
|-----------------------------------------------------|----------------------------------------|---------------------------------------------------------------------------|
| O(3)-Tb(1) 2.298(4)                                 | O(10)-Mn(2)-O(15) 89.94(19)            | O(10)-Na(1)-O(5) 122.0(2)                                                 |
| O(14)-Tb(1) 2.445(5)                                | O(21)-Mn(2)-O(15) 97.71(17)            | O(6)-Na(1)-O(1) 109.79(19)                                                |
| O(7)-Tb(1) 2.379(4)                                 | N(3)-Mn(2)-O(15) 86.8(2)               | O(2)-Na(1)-O(1) 66.00(18)                                                 |
| O(11)-Tb(1) 2.291(4)                                | O(11)-Mn(2)-O(17) 79.92(17)            | O(10)-Na(1)-O(1) 131.51(19)                                               |
| O(13)-Tb(1) 2.455(5)                                | O(10)-Mn(2)-O(17) 95.44(18)            | O(5)-Na(1)-O(1) 89.44(19)                                                 |
| O(17)-Tb(1) 2.750(4)                                | O(21)-Mn(2)-O(17) 80.67(16)            | O(6)-Na(1)-O(9) 164.1(2)                                                  |
| O(19)-Tb(1) 2.326(5)                                | N(3)-Mn(2)-O(17) 94.29(19)             | O(2)-Na(1)-O(9) 103.92(19)                                                |
| O(21)-Tb(1) 2.882(4)                                | O(15)-Mn(2)-O(17) 174.46(17)           | O(10)-Na(1)-O(9) 64.97(17)                                                |
| O(22)-Tb(1) 2.407(5)                                |                                        | O(5)-Na(1)-O(9) 99.15(19)                                                 |
| <b>Bond Lengths around Sodium</b>                   | <b>Bond Angles around Manganese(3)</b> | O(1)-Na(1)-O(9) 74.98(18)                                                 |
| O(1)-Na(1) 2.428(6)                                 | O(3)-Mn(3)-O(2) 173.61(19)             | O(6)-Na(1)-O(21) 63.70(14)                                                |
| O(2)-Na(1) 2.341(5)                                 | O(3)-Mn(3)-O(21) 90.28(18)             | O(2)-Na(1)-O(21) 66.11(15)                                                |
| O(5)-Na(1) 2.420(6)                                 | O(2)-Mn(3)-O(21) 95.72(19)             | O(10)-Na(1)-O(21) 63.60(14)                                               |
| O(9)-Na(1) 2.550(5)                                 | O(3)-Mn(3)-N(1) 82.1(2)                | O(5)-Na(1)-O(21) 123.38(18)                                               |
| O(10)-Na(1) 2.412(5)                                | O(2)-Mn(3)-N(1) 91.7(2)                | O(1)-Na(1)-O(21) 131.33(18)                                               |
| O(21)-Na(1) 2.843(5)                                | O(21)-Mn(3)-N(1) 170.9(2)              | O(9)-Na(1)-O(21) 125.20(17)                                               |
| O(6)-Na(1) 2.321(5)                                 | O(3)-Mn(3)-O(18) 92.44(18)             | <b>Bond Angles containing Manganese and Terbium</b>                       |
| <b>Bond Lengths containing Sodium and Manganese</b> | O(2)-Mn(3)-O(18) 89.34(18)             | Mn(3)-O(3)-Tb(1) 114.9(2)                                                 |
| Na(1)-Mn(1) 3.496(3)                                | O(21)-Mn(3)-O(18) 93.78(16)            | Mn(1)-O(7)-Tb(1) 113.58(19)                                               |
| Na(1)-Mn(2) 3.358(3)                                | N(1)-Mn(3)-O(18) 91.53(19)             | Mn(2)-O(11)-Tb(1) 106.82(18)                                              |
| Na(1)-Mn(3) 3.444(3)                                | O(3)-Mn(3)-N(4) 89.5(2)                | Mn(2)-O(17)-Tb(1) 82.00(13)                                               |
|                                                     | O(2)-Mn(3)-N(4) 88.9(2)                | Mn(1)-O(21)-Tb(1) 94.28(15)                                               |
|                                                     | O(21)-Mn(3)-N(4) 84.29(18)             | Mn(2)-O(21)-Tb(1) 86.23(14)                                               |
|                                                     | N(1)-Mn(3)-N(4) 90.6(2)                | Mn(3)-O(21)-Tb(1) 91.67(15)                                               |
|                                                     | O(18)-Mn(3)-N(4) 177.28(18)            |                                                                           |
| <b>Bond Lengths containing Manganese-Manganese</b>  | <b>Bond Angles around Terbium</b>      | <b>Bond Angles containing Manganese and Sodium</b>                        |
| Mn(1)-Mn(2) 3.313(2)                                | O(11)-Tb(1)-O(3) 122.38(15)            | Mn(3)-O(2)-Na(1) 108.3(2)                                                 |
| Mn(1)-Mn(3) 3.112(2)                                | O(11)-Tb(1)-O(19) 148.49(16)           | Mn(1)-O(6)-Na(1) 111.1(2)                                                 |
| Mn(2)-Mn(3) 3.569(2)                                | O(3)-Tb(1)-O(19) 82.75(16)             | Mn(2)-O(10)-Na(1) 101.93(19)                                              |
| <b>Bond Lengths containing Manganese-Terbium</b>    | O(11)-Tb(1)-O(7) 84.89(15)             | Mn(1)-O(21)-Na(1) 92.57(16)                                               |
| Mn(1)-Tb(1) 3.575(1)                                | O(3)-Tb(1)-O(7) 81.44(15)              | Mn(2)-O(21)-Na(1) 87.28(15)                                               |
| Mn(2)-Tb(1) 3.360(1)                                | O(19)-Tb(1)-O(7) 80.29(16)             | Mn(3)-O(21)-Na(1) 89.75(16)                                               |
| Mn(3)-Tb(1) 3.531(1)                                | O(11)-Tb(1)-O(22) 75.36(16)            | <b>Bond Angles containing Manganese(1), Manganese(2) and Manganese(3)</b> |
|                                                     | O(3)-Tb(1)-O(22) 151.90(16)            | Mn(1)-O(21)-Mn(2) 119.4(2)                                                |
| <b>Bond Length containing sodium-Terbium</b>        | O(19)-Tb(1)-O(22) 74.54(17)            | Mn(1)-O(21)-Mn(3) 107.13(19)                                              |
| Na(1)-Tb(1) 5.712(1)                                | O(7)-Tb(1)-O(22) 78.64(16)             | Mn(2)-O(21)-Mn(3) 133.5(2)                                                |
|                                                     | O(11)-Tb(1)-O(14) 125.82(16)           | Mn(3)-N(4)-Mn(1) 85.35(18)                                                |
|                                                     | O(3)-Tb(1)-O(14) 73.72(16)             |                                                                           |
|                                                     | O(19)-Tb(1)-O(14) 76.49(17)            |                                                                           |
|                                                     | O(7)-Tb(1)-O(14) 147.73(15)            |                                                                           |
|                                                     | O(22)-Tb(1)-O(14) 115.54(17)           |                                                                           |

**Table S4.** Selected bond distances (Å) and bond angles (°) for compound **3** (Mn<sub>3</sub>GdNa).

|                                         |           |                                        |          |                                                        |          |
|-----------------------------------------|-----------|----------------------------------------|----------|--------------------------------------------------------|----------|
| <b>Bond Lengths around Manganese(1)</b> |           | <b>Bond Angles around Manganese(1)</b> |          | O(11)-Gd(1)-O(15)                                      | 65.8(3)  |
| N(1)-Mn(1)                              | 2.014(11) | O(3)-Mn(1)-O(2)                        | 173.6(4) | O(3)-Gd(1)-O(15)                                       | 75.7(3)  |
| N(4)-Mn(1)                              | 2.254(10) | O(3)-Mn(1)-O(21)                       | 89.4(4)  | O(20)-Gd(1)-O(15)                                      | 146.2(3) |
| O(2)-Mn(1)                              | 1.907(9)  | O(2)-Mn(1)-O(21)                       | 96.5(4)  | O(7)-Gd(1)-O(15)                                       | 121.2(3) |
| O(3)-Mn(1)                              | 1.872(8)  | O(3)-Mn(1)-N(1)                        | 82.2(4)  | O(22)-Gd(1)-O(15)                                      | 133.0(3) |
| O(16)-Mn(1)                             | 2.194(9)  | O(2)-Mn(1)-N(1)                        | 91.7(4)  | O(13)-Gd(1)-O(15)                                      | 77.2(3)  |
| O(21)-Mn(1)                             | 1.973(8)  | O(21)-Mn(1)-N(1)                       | 170.3(4) | O(14)-Gd(1)-O(15)                                      | 72.6(3)  |
| <b>Bond Lengths around Manganese(2)</b> |           | O(3)-Mn(1)-O(16)                       | 92.3(4)  | <b>Bond Angles around Sodium</b>                       |          |
| N(4)-Mn(2)                              | 2.340(10) | O(2)-Mn(1)-O(16)                       | 89.8(3)  | O(2)-Na(1)-O(6)                                        | 91.8(4)  |
| O(6)-Mn(2)                              | 1.901(9)  | O(21)-Mn(1)-O(16)                      | 93.2(3)  | O(2)-Na(1)-O(1)                                        | 65.9(3)  |
| O(7)-Mn(2)                              | 1.896(8)  | N(1)-Mn(1)-O(16)                       | 92.0(4)  | O(6)-Na(1)-O(1)                                        | 110.2(4) |
| O(17)-Mn(2)                             | 2.166(8)  | O(3)-Mn(1)-N(4)                        | 89.2(4)  | O(2)-Na(1)-O(10)                                       | 98.1(3)  |
| O(21)-Mn(2)                             | 1.907(8)  | O(2)-Mn(1)-N(4)                        | 89.0(4)  | O(6)-Na(1)-O(10)                                       | 115.9(3) |
| N(2)-Mn(2)                              | 1.994(10) | O(21)-Mn(1)-N(4)                       | 84.4(3)  | O(1)-Na(1)-O(10)                                       | 131.6(4) |
| <b>Bond Lengths around Manganese(3)</b> |           | N(1)-Mn(1)-N(4)                        | 90.6(4)  | O(2)-Na(1)-O(5)                                        | 140.0(4) |
| N(3)-Mn(3)                              | 2.011(10) | O(16)-Mn(1)-N(4)                       | 177.2(4) | O(6)-Na(1)-O(5)                                        | 66.1(3)  |
| O(10)-Mn(3)                             | 1.889(9)  | <b>Bond Angles around Manganese(2)</b> |          | O(1)-Na(1)-O(5)                                        | 89.9(4)  |
| O(15)-Mn(3)                             | 2.357(9)  | O(7)-Mn(2)-O(6)                        | 175.5(4) | O(10)-Na(1)-O(5)                                       | 121.3(4) |
| O(11)-Mn(3)                             | 1.878(8)  | O(7)-Mn(2)-O(21)                       | 90.3(4)  | O(2)-Na(1)-O(9)                                        | 103.8(4) |
| O(18)-Mn(3)                             | 2.133(9)  | O(6)-Mn(2)-O(21)                       | 93.8(4)  | O(6)-Na(1)-O(9)                                        | 164.1(4) |
| O(21)-Mn(3)                             | 1.931(8)  | O(7)-Mn(2)-N(2)                        | 84.4(4)  | O(1)-Na(1)-O(9)                                        | 74.5(3)  |
| <b>Bond Lengths around Gadolinium</b>   |           | O(6)-Mn(2)-N(2)                        | 91.3(4)  | O(10)-Na(1)-O(9)                                       | 65.2(3)  |
| O(3)-Gd(1)                              | 2.311(8)  | O(21)-Mn(2)-N(2)                       | 169.6(4) | O(5)-Na(1)-O(9)                                        | 99.3(4)  |
| O(7)-Gd(1)                              | 2.393(8)  | O(7)-Mn(2)-O(17)                       | 92.9(4)  | O(2)-Na(1)-O(21)                                       | 66.7(3)  |
| O(11)-Gd(1)                             | 2.309(8)  | O(6)-Mn(2)-O(17)                       | 88.0(4)  | O(6)-Na(1)-O(21)                                       | 63.5(3)  |
| O(13)-Gd(1)                             | 2.467(9)  | O(21)-Mn(2)-O(17)                      | 102.1(3) | O(1)-Na(1)-O(21)                                       | 131.8(4) |
| O(14)-Gd(1)                             | 2.470(9)  | N(2)-Mn(2)-O(17)                       | 87.1(4)  | O(10)-Na(1)-O(21)                                      | 63.5(3)  |
| O(15)-Gd(1)                             | 2.691(9)  | O(7)-Mn(2)-N(4)                        | 89.3(4)  | O(5)-Na(1)-O(21)                                       | 122.7(3) |
| O(20)-Gd(1)                             | 2.320(10) | O(6)-Mn(2)-N(4)                        | 89.4(4)  | O(9)-Na(1)-O(21)                                       | 125.4(3) |
| O(21)-Gd(1)                             | 2.838(8)  | O(21)-Mn(2)-N(4)                       | 83.5(3)  | <b>Bond Angles containing Manganese and Gadolinium</b> |          |
| O(22)-Gd(1)                             | 2.444(9)  | N(2)-Mn(2)-N(4)                        | 87.5(4)  | Mn(1)-O(3)-Gd(1)                                       | 114.5(4) |
| <b>Bond Lengths around</b>              |           | O(17)-Mn(2)-N(4)                       | 173.9(3) | Mn(2)-O(7)-Gd(1)                                       | 112.2(4) |
|                                         |           | <b>Bond Angles around Manganese(3)</b> |          | Mn(3)-O(11)-Gd(1)                                      | 105.9(3) |
|                                         |           | O(11)-Mn(3)-O(10)                      | 172.7(4) | Mn(3)-O(15)-Gd(1)                                      | 82.9(3)  |
|                                         |           | O(11)-Mn(3)-O(21)                      | 90.5(4)  | Mn(2)-O(21)-Gd(1)                                      | 95.6(3)  |
|                                         |           | O(10)-Mn(3)-O(21)                      | 94.6(4)  | Mn(3)-O(21)-Gd(1)                                      | 87.1(3)  |
|                                         |           | O(11)-Mn(3)-N(3)                       | 83.1(4)  | Mn(1)-O(21)-Gd(1)                                      | 92.5(3)  |
|                                         |           | O(10)-Mn(3)-N(3)                       | 91.3(4)  |                                                        |          |
|                                         |           | O(21)-Mn(3)-N(3)                       | 172.0(4) |                                                        |          |

|                                                          |                                          |                                                                                       |
|----------------------------------------------------------|------------------------------------------|---------------------------------------------------------------------------------------|
| <b>Sodium</b>                                            | O(11)-Mn(3)-O(18) 94.4(4)                | <b>Bond Angles containing<br/>Manganese and Sodium</b>                                |
| O(1)-Na(1) 2.404(10)                                     | O(10)-Mn(3)-O(18) 90.1(4)                |                                                                                       |
| O(2)-Na(1) 2.328(10)                                     | O(21)-Mn(3)-O(18) 98.1(3)                |                                                                                       |
| O(5)-Na(1) 2.437(10)                                     | N(3)-Mn(3)-O(18) 87.1(4)                 |                                                                                       |
| O(6)-Na(1) 2.341(10)                                     | O(11)-Mn(3)-O(15) 79.6(3)                |                                                                                       |
| O(9)-Na(1) 2.543(11)                                     | O(10)-Mn(3)-O(15) 96.1(3)                |                                                                                       |
| O(10)-Na(1) 2.405(10)                                    | O(21)-Mn(3)-O(15) 79.7(3)                |                                                                                       |
| O(21)-Na(1) 2.873(9)                                     | N(3)-Mn(3)-O(15) 94.4(4)                 |                                                                                       |
|                                                          | O(18)-Mn(3)-O(15) 173.5(3)               |                                                                                       |
|                                                          |                                          |                                                                                       |
|                                                          |                                          | Mn(1)-O(2)-Na(1) 108.3(4)                                                             |
|                                                          |                                          | Mn(3)-O(10)-Na(1) 102.2(4)                                                            |
|                                                          |                                          | Mn(2)-O(21)-Na(1) 91.9(3)                                                             |
|                                                          |                                          | Mn(3)-O(21)-Na(1) 86.4(3)                                                             |
|                                                          |                                          | Mn(1)-O(21)-Na(1) 88.5(3)                                                             |
| <b>Bond Lengths containing<br/>Sodium and Manganese</b>  | <b>Bond Angles around<br/>Gadolinium</b> | <b>Bond Angles containing<br/>Manganese(1),<br/>Manganese(2) and<br/>Manganese(3)</b> |
| Na(1)-Mn(3) 3.359(5)                                     | O(11)-Gd(1)-O(3) 123.1(3)                |                                                                                       |
| Na(1)-Mn(1) 3.441(6)                                     | O(11)-Gd(1)-O(20) 147.4(3)               |                                                                                       |
| Na(1)-Mn(2) 3.501(5)                                     | O(3)-Gd(1)-O(20) 82.5(3)                 |                                                                                       |
|                                                          | O(11)-Gd(1)-O(7) 84.6(3)                 |                                                                                       |
| <b>Bond Lengths containing<br/>Manganese-Manganese</b>   | O(3)-Gd(1)-O(7) 81.2(3)                  | Mn(1)-N(4)-Mn(2) 85.4(3)                                                              |
|                                                          | O(20)-Gd(1)-O(7) 79.6(3)                 | Mn(2)-O(21)-Mn(3) 119.3(4)                                                            |
| Mn(1)-Mn(2) 3.115(3)                                     | O(11)-Gd(1)-O(22) 74.6(3)                | Mn(2)-O(21)-Mn(1) 106.8(4)                                                            |
| Mn(1)-Mn(3) 3.590(3)                                     | O(3)-Gd(1)-O(22) 150.5(3)                | Mn(3)-O(21)-Mn(1) 133.8(4)                                                            |
| Mn(2)-Mn(3) 3.312(3)                                     | O(20)-Gd(1)-O(22) 74.2(3)                |                                                                                       |
|                                                          | O(7)-Gd(1)-O(22) 77.1(3)                 |                                                                                       |
| <b>Bond Lengths containing<br/>Manganese- Gadolinium</b> | O(11)-Gd(1)-O(13) 85.5(3)                |                                                                                       |
|                                                          | O(3)-Gd(1)-O(13) 125.4(3)                |                                                                                       |
| Mn(1)-Gd(1) 3.526(2)                                     | O(20)-Gd(1)-O(13) 95.5(3)                |                                                                                       |
| Mn(2)-Gd(1) 3.571(2)                                     | O(7)-Gd(1)-O(13) 152.3(3)                |                                                                                       |
| Mn(3)-Gd(1) 3.351(2)                                     | O(22)-Gd(1)-O(13) 75.4(3)                |                                                                                       |
|                                                          | O(11)-Gd(1)-O(14) 126.4(3)               |                                                                                       |
| <b>Bond Length containing<br/>Sodium- Gadolinium</b>     | O(3)-Gd(1)-O(14) 74.2(3)                 |                                                                                       |
|                                                          | O(20)-Gd(1)-O(14) 76.8(3)                |                                                                                       |
|                                                          | O(7)-Gd(1)-O(14) 147.8(3)                |                                                                                       |
|                                                          | O(22)-Gd(1)-O(14) 116.4(3)               |                                                                                       |
|                                                          | O(13)-Gd(1)-O(14) 52.7(3)                |                                                                                       |
| Na(1)-Gd(1) 5.697(5)                                     |                                          |                                                                                       |

**Table S5.** Selected bond distances (Å) and bond angles (°) for compound **4(Mn<sub>3</sub>NdNa)**.

|                                             |                                            |                                  |
|---------------------------------------------|--------------------------------------------|----------------------------------|
| <b>Bond Lengths around<br/>Manganese(1)</b> | <b>Bond Angles around<br/>Manganese(1)</b> | O(19)-Nd(1)-O(21) 129.5(2)       |
| N(2)-Mn(1) 1.995(8)                         | O(7)-Mn(1)-O(6) 175.4(3)                   | O(7)-Nd(1)-O(21) 60.37(19)       |
| N(4)-Mn(1) 2.337(8)                         | O(7)-Mn(1)-O(21) 91.3(3)                   | O(22)-Nd(1)-O(21) 121.5(2)       |
| O(6)-Mn(1) 1.898(6)                         | O(6)-Mn(1)-O(21) 93.0(3)                   | O(17)-Nd(1)-O(21) 121.6(2)       |
| O(7)-Mn(1) 1.870(6)                         | O(7)-Mn(1)-N(2) 83.7(3)                    | O(18)-Nd(1)-O(21) 132.8(2)       |
| O(16)-Mn(1) 2.163(7)                        | O(6)-Mn(1)-N(2) 91.8(3)                    | O(14)-Nd(1)-O(21) 59.07(17)      |
|                                             | O(21)-Mn(1)-N(2) 169.3(3)                  | <b>Bond Angles around Sodium</b> |

|                                                     |                                        |                                                                           |
|-----------------------------------------------------|----------------------------------------|---------------------------------------------------------------------------|
| O(21)-Mn(1) 1.919(6)                                | O(7)-Mn(1)-O(16) 92.3(3)               | O(6)-Na(1)-O(2) 92.2(3)                                                   |
| <b>Bond Lengths around Manganese(2)</b>             | O(6)-Mn(1)-O(16) 88.4(3)               | O(6)-Na(1)-O(10) 116.1(3)                                                 |
| N(3)-Mn(2) 2.024(7)                                 | O(21)-Mn(1)-O(16) 102.3(2)             | O(2)-Na(1)-O(10) 98.3(3)                                                  |
| O(11)-Mn(2) 1.871(6)                                | N(2)-Mn(1)-O(16) 87.4(3)               | O(6)-Na(1)-O(5) 66.7(3)                                                   |
| O(10)-Mn(2) 1.882(6)                                | O(7)-Mn(1)-N(4) 89.3(3)                | O(2)-Na(1)-O(5) 140.8(3)                                                  |
| O(14)-Mn(2) 2.355(7)                                | O(6)-Mn(1)-N(4) 89.6(3)                | O(10)-Na(1)-O(5) 120.4(3)                                                 |
| O(15)-Mn(2) 2.144(7)                                | O(21)-Mn(1)-N(4) 83.1(2)               | O(6)-Na(1)-O(1) 110.0(3)                                                  |
| O(21)-Mn(2) 1.941(5)                                | N(2)-Mn(1)-N(4) 87.4(3)                | O(2)-Na(1)-O(1) 66.1(3)                                                   |
| <b>Bond Lengths around Manganese(3)</b>             | O(16)-Mn(1)-N(4) 174.3(3)              | O(10)-Na(1)-O(1) 131.8(3)                                                 |
| O(21)-Mn(3) 1.974(6)                                | <b>Bond Angles around Manganese(2)</b> | O(5)-Na(1)-O(1) 89.7(3)                                                   |
| O(13)-Mn(3) 2.200(7)                                | O(11)-Mn(2)-O(10) 172.5(3)             | O(6)-Na(1)-O(9) 164.2(3)                                                  |
| O(3)-Mn(3) 1.874(6)                                 | O(11)-Mn(2)-O(21) 91.4(3)              | O(2)-Na(1)-O(9) 103.2(3)                                                  |
| N(4)-Mn(3) 2.256(7)                                 | O(10)-Mn(2)-O(21) 94.5(3)              | O(10)-Na(1)-O(9) 65.3(2)                                                  |
| N(1)-Mn(3) 2.013(8)                                 | O(11)-Mn(2)-N(3) 82.1(3)               | O(5)-Na(1)-O(9) 98.7(3)                                                   |
| O(2)-Mn(3) 1.892(6)                                 | O(10)-Mn(2)-N(3) 91.6(3)               | O(1)-Na(1)-O(9) 74.2(3)                                                   |
| <b>Bond Lengths around Neodymium</b>                | O(21)-Mn(2)-N(3) 172.1(3)              | O(6)-Na(1)-O(21) 63.8(2)                                                  |
| O(3)-Nd(1) 2.348(6)                                 | O(11)-Mn(2)-O(15) 94.0(3)              | O(2)-Na(1)-O(21) 66.5(2)                                                  |
| O(7)-Nd(1) 2.457(6)                                 | O(10)-Mn(2)-O(15) 89.8(3)              | O(10)-Na(1)-O(21) 63.9(2)                                                 |
| O(11)-Nd(1) 2.356(6)                                | O(21)-Mn(2)-O(15) 97.8(2)              | O(5)-Na(1)-O(21) 123.3(3)                                                 |
| O(19)-Nd(1) 2.368(7)                                | N(3)-Mn(2)-O(15) 87.2(3)               | O(1)-Na(1)-O(21) 131.8(3)                                                 |
| O(14)-Nd(1) 2.752(7)                                | O(11)-Mn(2)-O(14) 80.9(3)              | O(9)-Na(1)-O(21) 125.5(2)                                                 |
| O(18)-Nd(1) 2.516(6)                                | O(10)-Mn(2)-O(14) 95.5(3)              | <b>Bond Angles containing Manganese and Neodymium</b>                     |
| O(17)-Nd(1) 2.513(7)                                | O(21)-Mn(2)-O(14) 80.0(2)              | Mn(3)-O(3)-Nd(1) 114.6(3)                                                 |
| O(21)-Nd(1) 2.881(6)                                | N(3)-Mn(2)-O(14) 94.4(3)               | Mn(1)-O(7)-Nd(1) 112.4(3)                                                 |
| O(22)-Nd(1) 2.498(7)                                | O(15)-Mn(2)-O(14) 174.4(3)             | Mn(2)-O(11)-Nd(1) 105.9(3)                                                |
| <b>Bond Lengths around Sodium</b>                   | <b>Bond Angles around Manganese(3)</b> | Mn(2)-O(14)-Nd(1) 82.6(2)                                                 |
| O(21)-Na(1) 2.854(7)                                | O(3)-Mn(3)-O(2) 173.3(3)               | Mn(1)-O(21)-Nd(1) 95.4(2)                                                 |
| O(10)-Na(1) 2.406(7)                                | O(3)-Mn(3)-O(21) 90.2(3)               | Mn(2)-O(21)-Nd(1) 86.88(19)                                               |
| O(9)-Na(1) 2.551(8)                                 | O(2)-Mn(3)-O(21) 96.3(3)               | Mn(3)-O(21)-Nd(1) 92.4(2)                                                 |
| O(6)-Na(1) 2.319(8)                                 | O(3)-Mn(3)-N(1) 82.3(3)                | <b>Bond Angles containing Manganese and Sodium</b>                        |
| O(5)-Na(1) 2.422(9)                                 | O(2)-Mn(3)-N(1) 91.1(3)                | Mn(1)-O(21)-Na(1) 91.9(2)                                                 |
| O(2)-Na(1) 2.337(8)                                 | O(21)-Mn(3)-N(1) 171.1(3)              | Mn(2)-O(21)-Na(1) 86.5(2)                                                 |
| O(1)-Na(1) 2.425(8)                                 | O(3)-Mn(3)-O(13) 92.0(3)               | Mn(3)-O(21)-Na(1) 88.8(2)                                                 |
| <b>Bond Lengths containing Sodium and Manganese</b> | O(2)-Mn(3)-O(13) 89.4(3)               | Mn(2)-O(10)-Na(1) 102.1(3)                                                |
|                                                     | O(21)-Mn(3)-O(13) 93.4(2)              | Mn(1)-O(6)-Na(1) 111.4(3)                                                 |
|                                                     | N(1)-Mn(3)-O(13) 91.6(3)               | Mn(3)-O(2)-Na(1) 108.2(3)                                                 |
|                                                     | O(3)-Mn(3)-N(4) 89.7(3)                | <b>Bond Angles containing Manganese(1), Manganese(2) and Manganese(3)</b> |
|                                                     | O(2)-Mn(3)-N(4) 89.2(3)                |                                                                           |
|                                                     | O(21)-Mn(3)-N(4) 84.1(3)               |                                                                           |
|                                                     | N(1)-Mn(3)-N(4) 91.2(3)                |                                                                           |
|                                                     | O(13)-Mn(3)-N(4) 176.9(3)              |                                                                           |
|                                                     | <b>Bond Angles around</b>              |                                                                           |



|                                                         |                   |           |                            |
|---------------------------------------------------------|-------------------|-----------|----------------------------|
| Na(1)-Mn(1) 3.491(4)                                    | <b>Neodymium</b>  |           |                            |
| Na(1)-Mn(2) 3.352(4)                                    | O(3)-Nd(1)-O(11)  | 121.8(2)  | Mn(3)-N(4)-Mn(1) 85.9(2)   |
| Na(1)-Mn(3) 3.436(4)                                    | O(3)-Nd(1)-O(19)  | 83.3(2)   | Mn(1)-O(21)-Mn(2) 119.1(3) |
|                                                         | O(11)-Nd(1)-O(19) | 147.7(3)  | Mn(1)-O(21)-Mn(3) 107.0(3) |
| <b>Bond Lengths containing<br/>Manganese-Manganese</b>  | O(3)-Nd(1)-O(7)   | 81.1(2)   | Mn(2)-O(21)-Mn(3) 133.7(3) |
|                                                         | O(11)-Nd(1)-O(7)  | 83.9(2)   |                            |
| Mn(1)-Mn(2) 3.329(2)                                    | O(19)-Nd(1)-O(7)  | 80.2(2)   |                            |
| Mn(1)-Mn(3) 3.129(2)                                    | O(3)-Nd(1)-O(22)  | 151.5(2)  |                            |
| Mn(2)-Mn(3) 3.601(2)                                    | O(11)-Nd(1)-O(22) | 75.2(2)   |                            |
|                                                         | O(19)-Nd(1)-O(22) | 74.1(3)   |                            |
| <b>Bond Lengths containing<br/>Manganese- Neodymium</b> | O(7)-Nd(1)-O(22)  | 78.2(2)   |                            |
|                                                         | O(3)-Nd(1)-O(17)  | 74.9(2)   |                            |
| Mn(1)-Nd(1) 3.61 (2)                                    | O(11)-Nd(1)-O(17) | 126.0(2)  |                            |
| Mn(2)-Nd(1) 3.385(2)                                    | O(19)-Nd(1)-O(17) | 77.2(3)   |                            |
| Mn(3)-Nd(1) 3.561(2)                                    | O(7)-Nd(1)-O(17)  | 148.7(2)  |                            |
|                                                         | O(22)-Nd(1)-O(17) | 115.4(3)  |                            |
| <b>Bond Length containing<br/>Sodium- Neodymium</b>     | O(3)-Nd(1)-O(18)  | 124.9(2)  |                            |
|                                                         | O(11)-Nd(1)-O(18) | 85.4(2)   |                            |
|                                                         | O(19)-Nd(1)-O(18) | 96.5(3)   |                            |
|                                                         | O(7)-Nd(1)-O(18)  | 153.5(2)  |                            |
|                                                         | O(22)-Nd(1)-O(18) | 75.7(3)   |                            |
|                                                         | O(17)-Nd(1)-O(18) | 51.9(2)   |                            |
|                                                         | O(3)-Nd(1)-O(14)  | 74.6(2)   |                            |
|                                                         | O(11)-Nd(1)-O(14) | 65.0(2)   |                            |
|                                                         | O(19)-Nd(1)-O(14) | 146.9(2)  |                            |
|                                                         | O(7)-Nd(1)-O(14)  | 119.3(2)  |                            |
|                                                         | O(22)-Nd(1)-O(14) | 133.0(2)  |                            |
|                                                         | O(17)-Nd(1)-O(14) | 73.4(2)   |                            |
|                                                         | O(18)-Nd(1)-O(14) | 77.1(2)   |                            |
|                                                         | O(3)-Nd(1)-O(21)  | 61.85(19) |                            |
|                                                         | O(11)-Nd(1)-O(21) | 61.85(17) |                            |
